# Supplementary material
Source: Springer Nature journal article supplement (http://www.springermedizin.de/resource/supplementary/12990_2010_286_MOESM1_ESM.pdf/9612956)

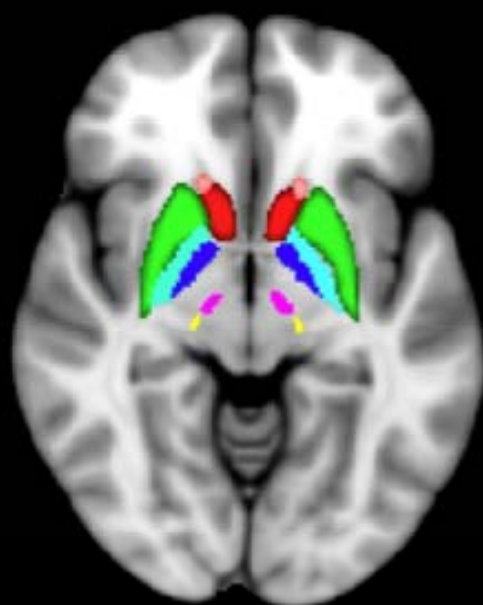

- Caudate
- Putamen
- Accumbens
- External Globus Pallidus
- Internal Globus Pallidus
- Subthalamic Nucleus
- Substantia Nigra

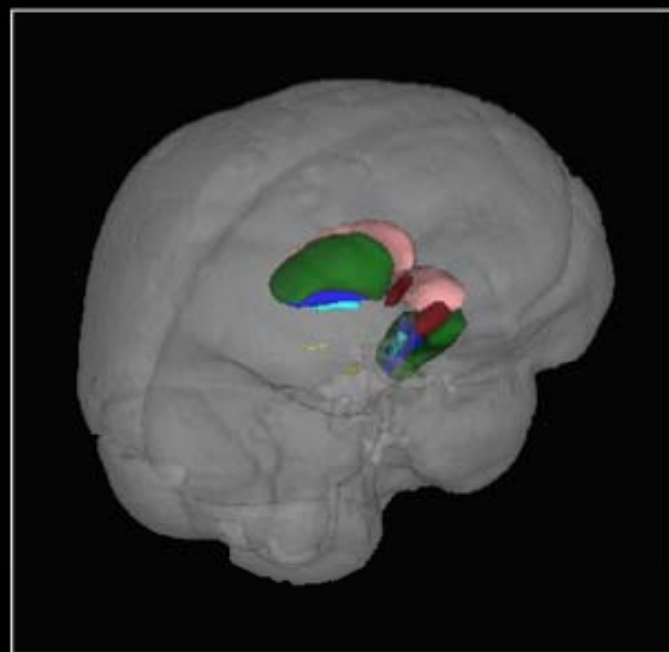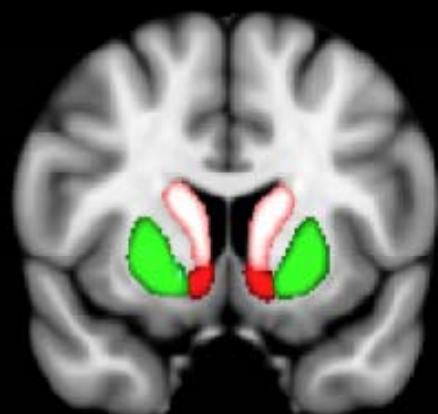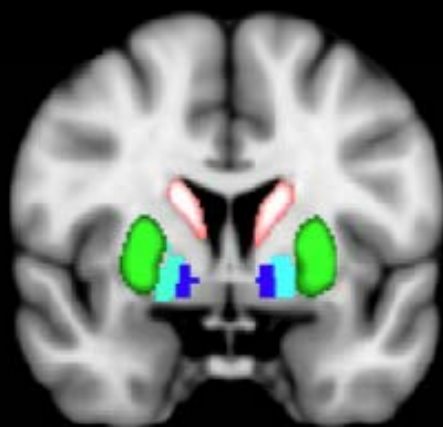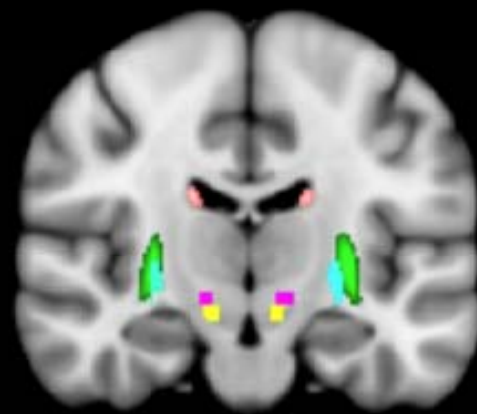

Supplement: MOESM1 [file 9612956]
